# Supplementary material
Source: MDPI journal article supplement (https://www.mdpi.com/2311-7524/10/3/299)

A

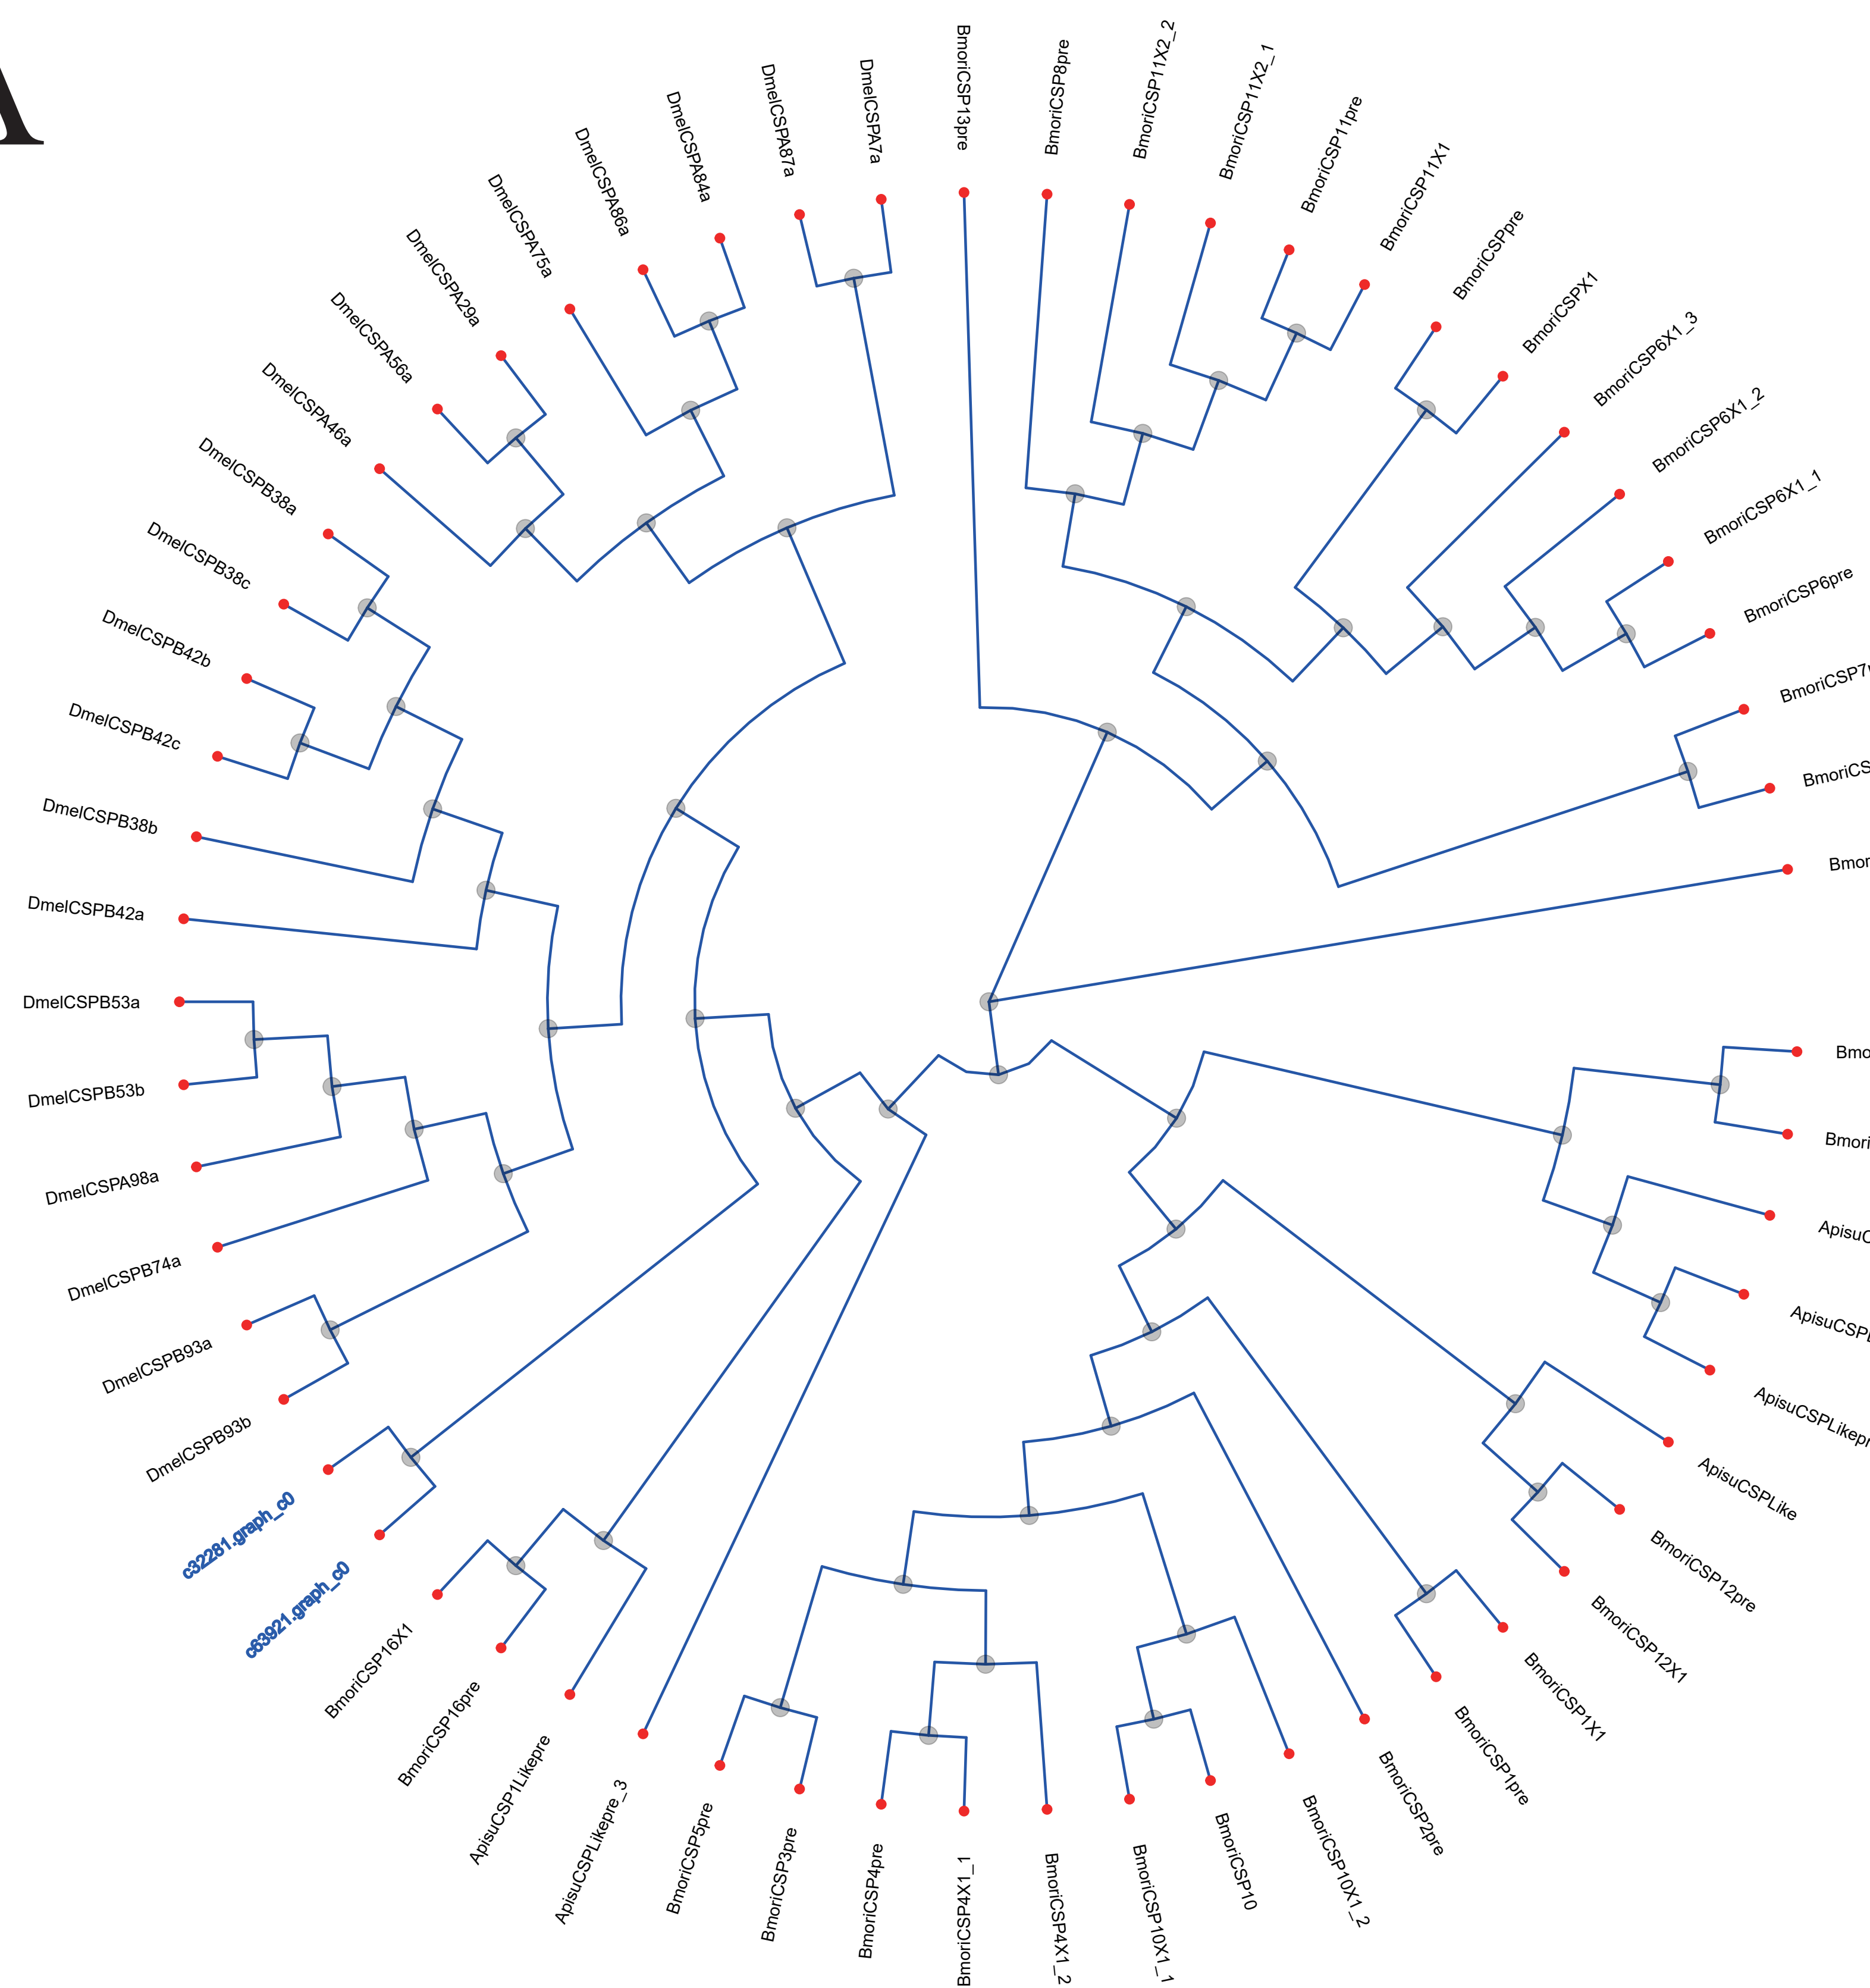

CSP

B

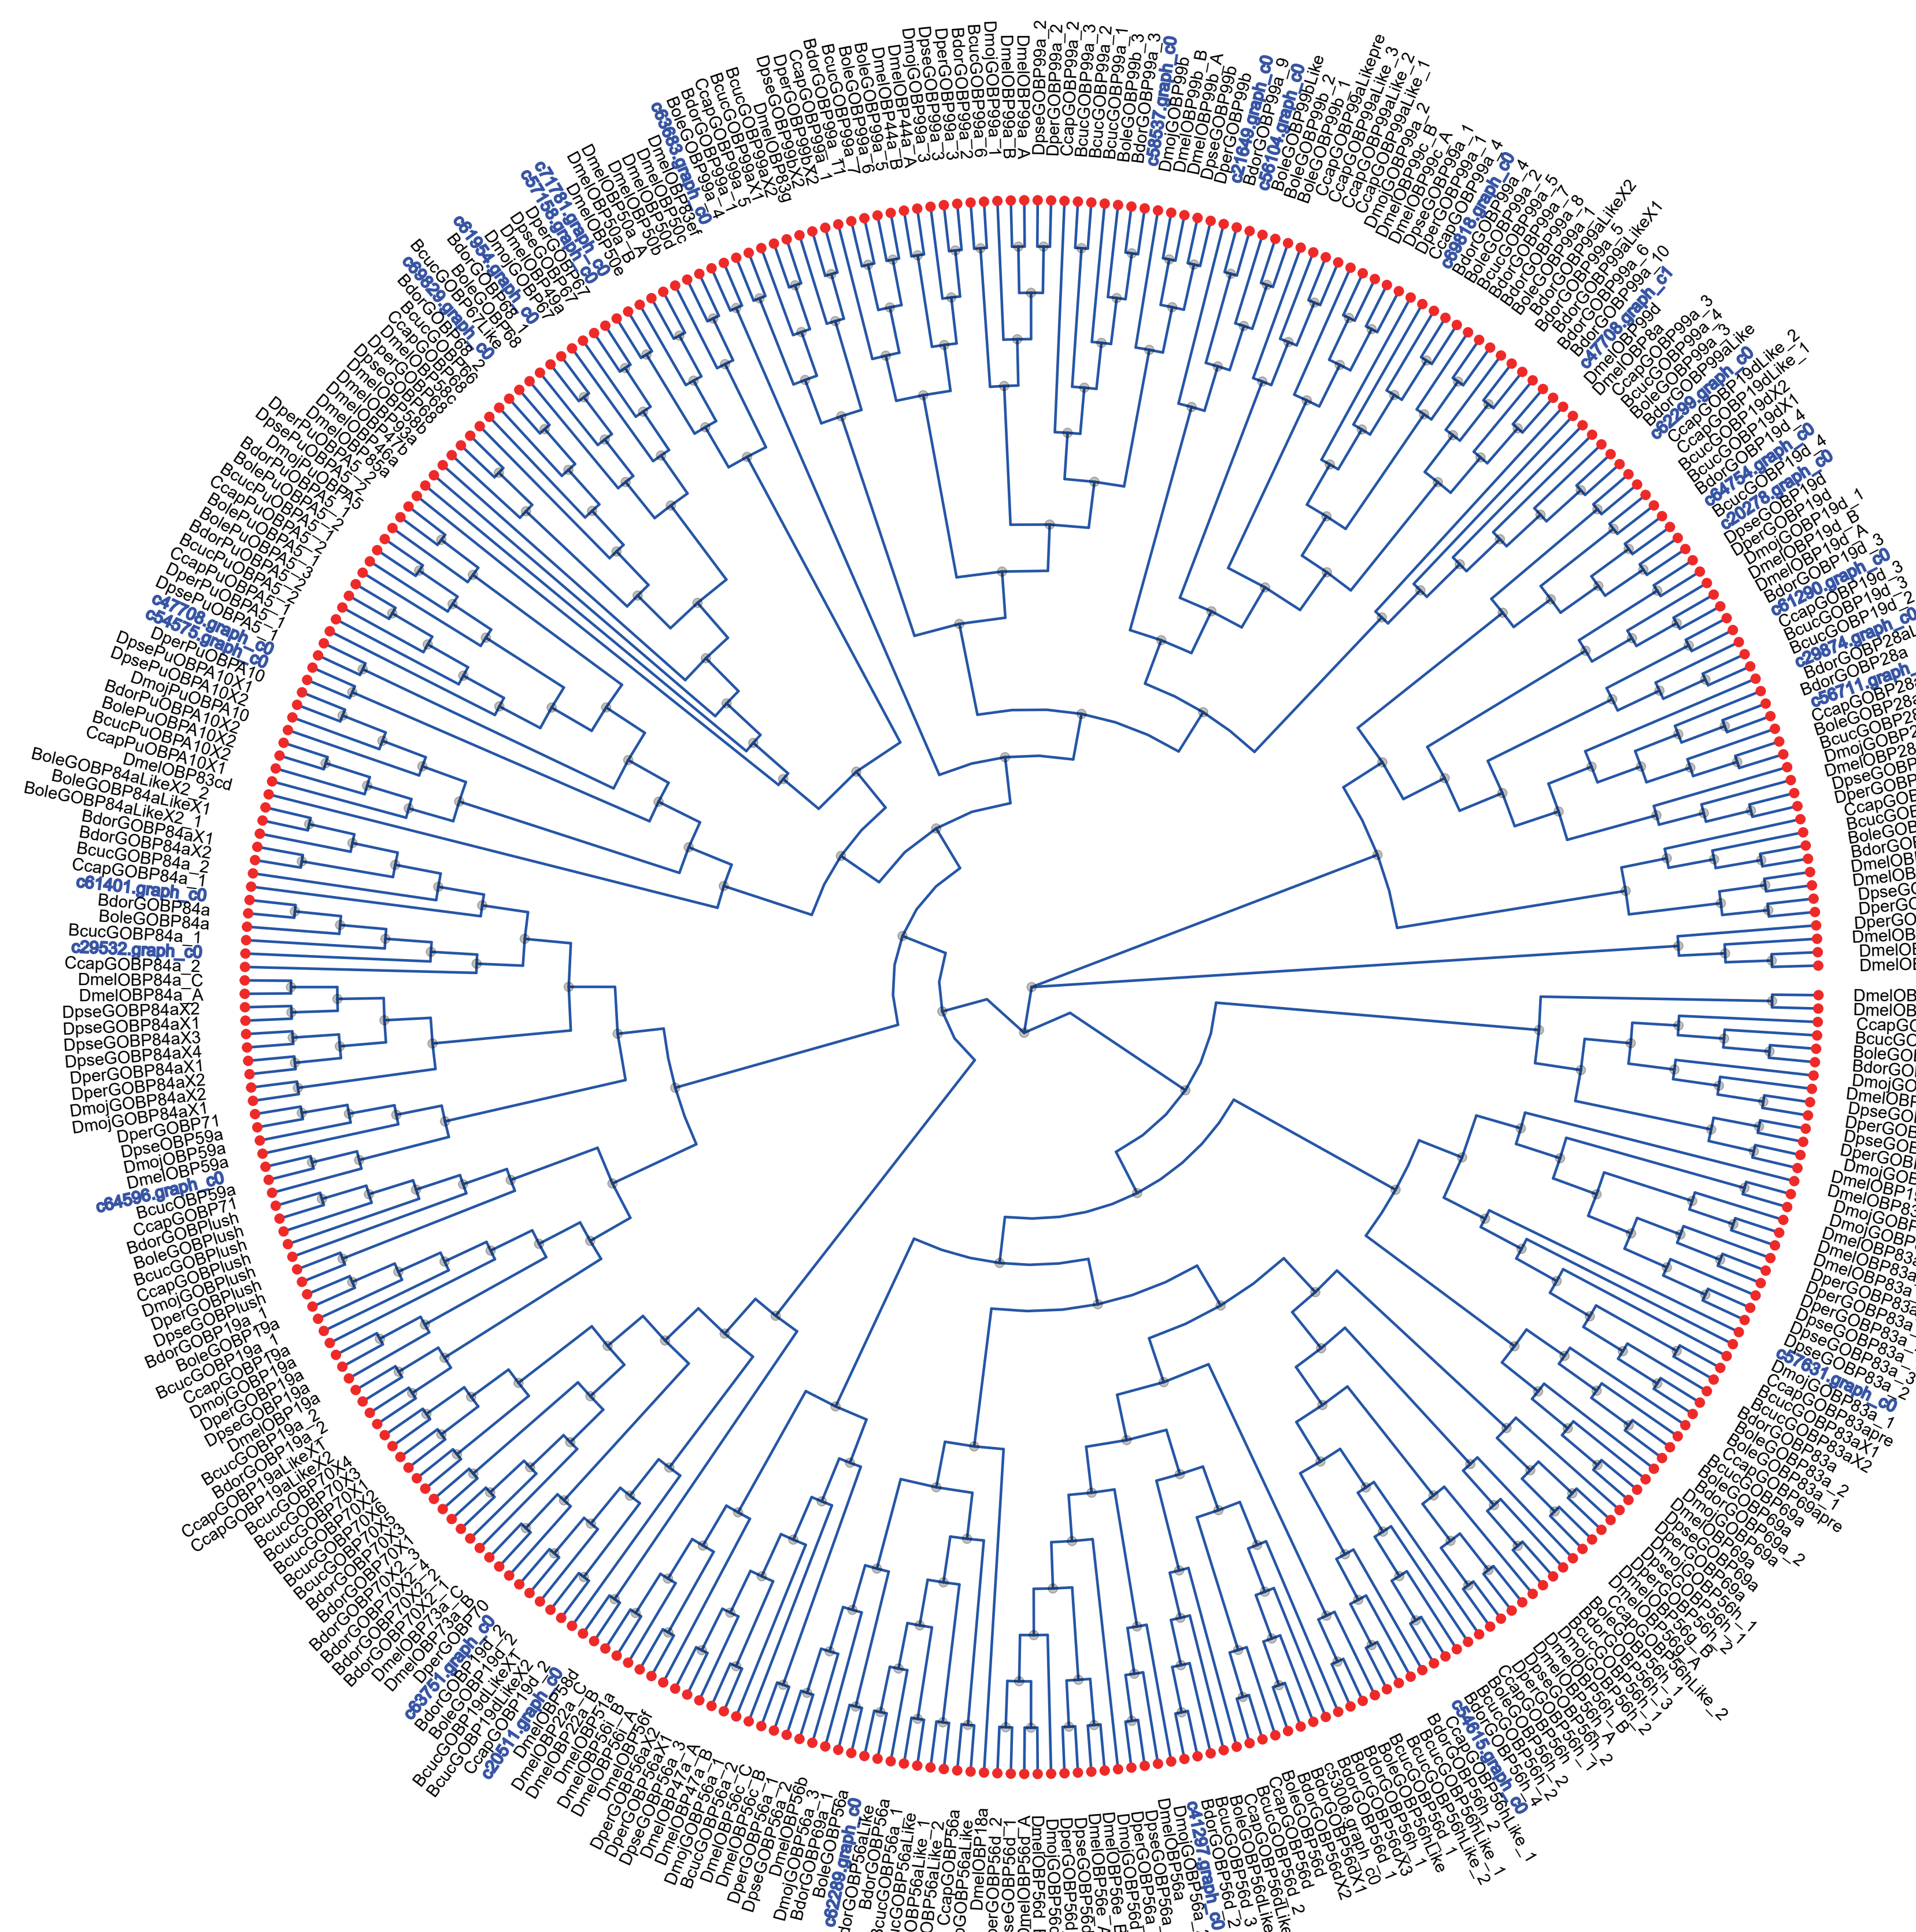

OBPGOBP

C

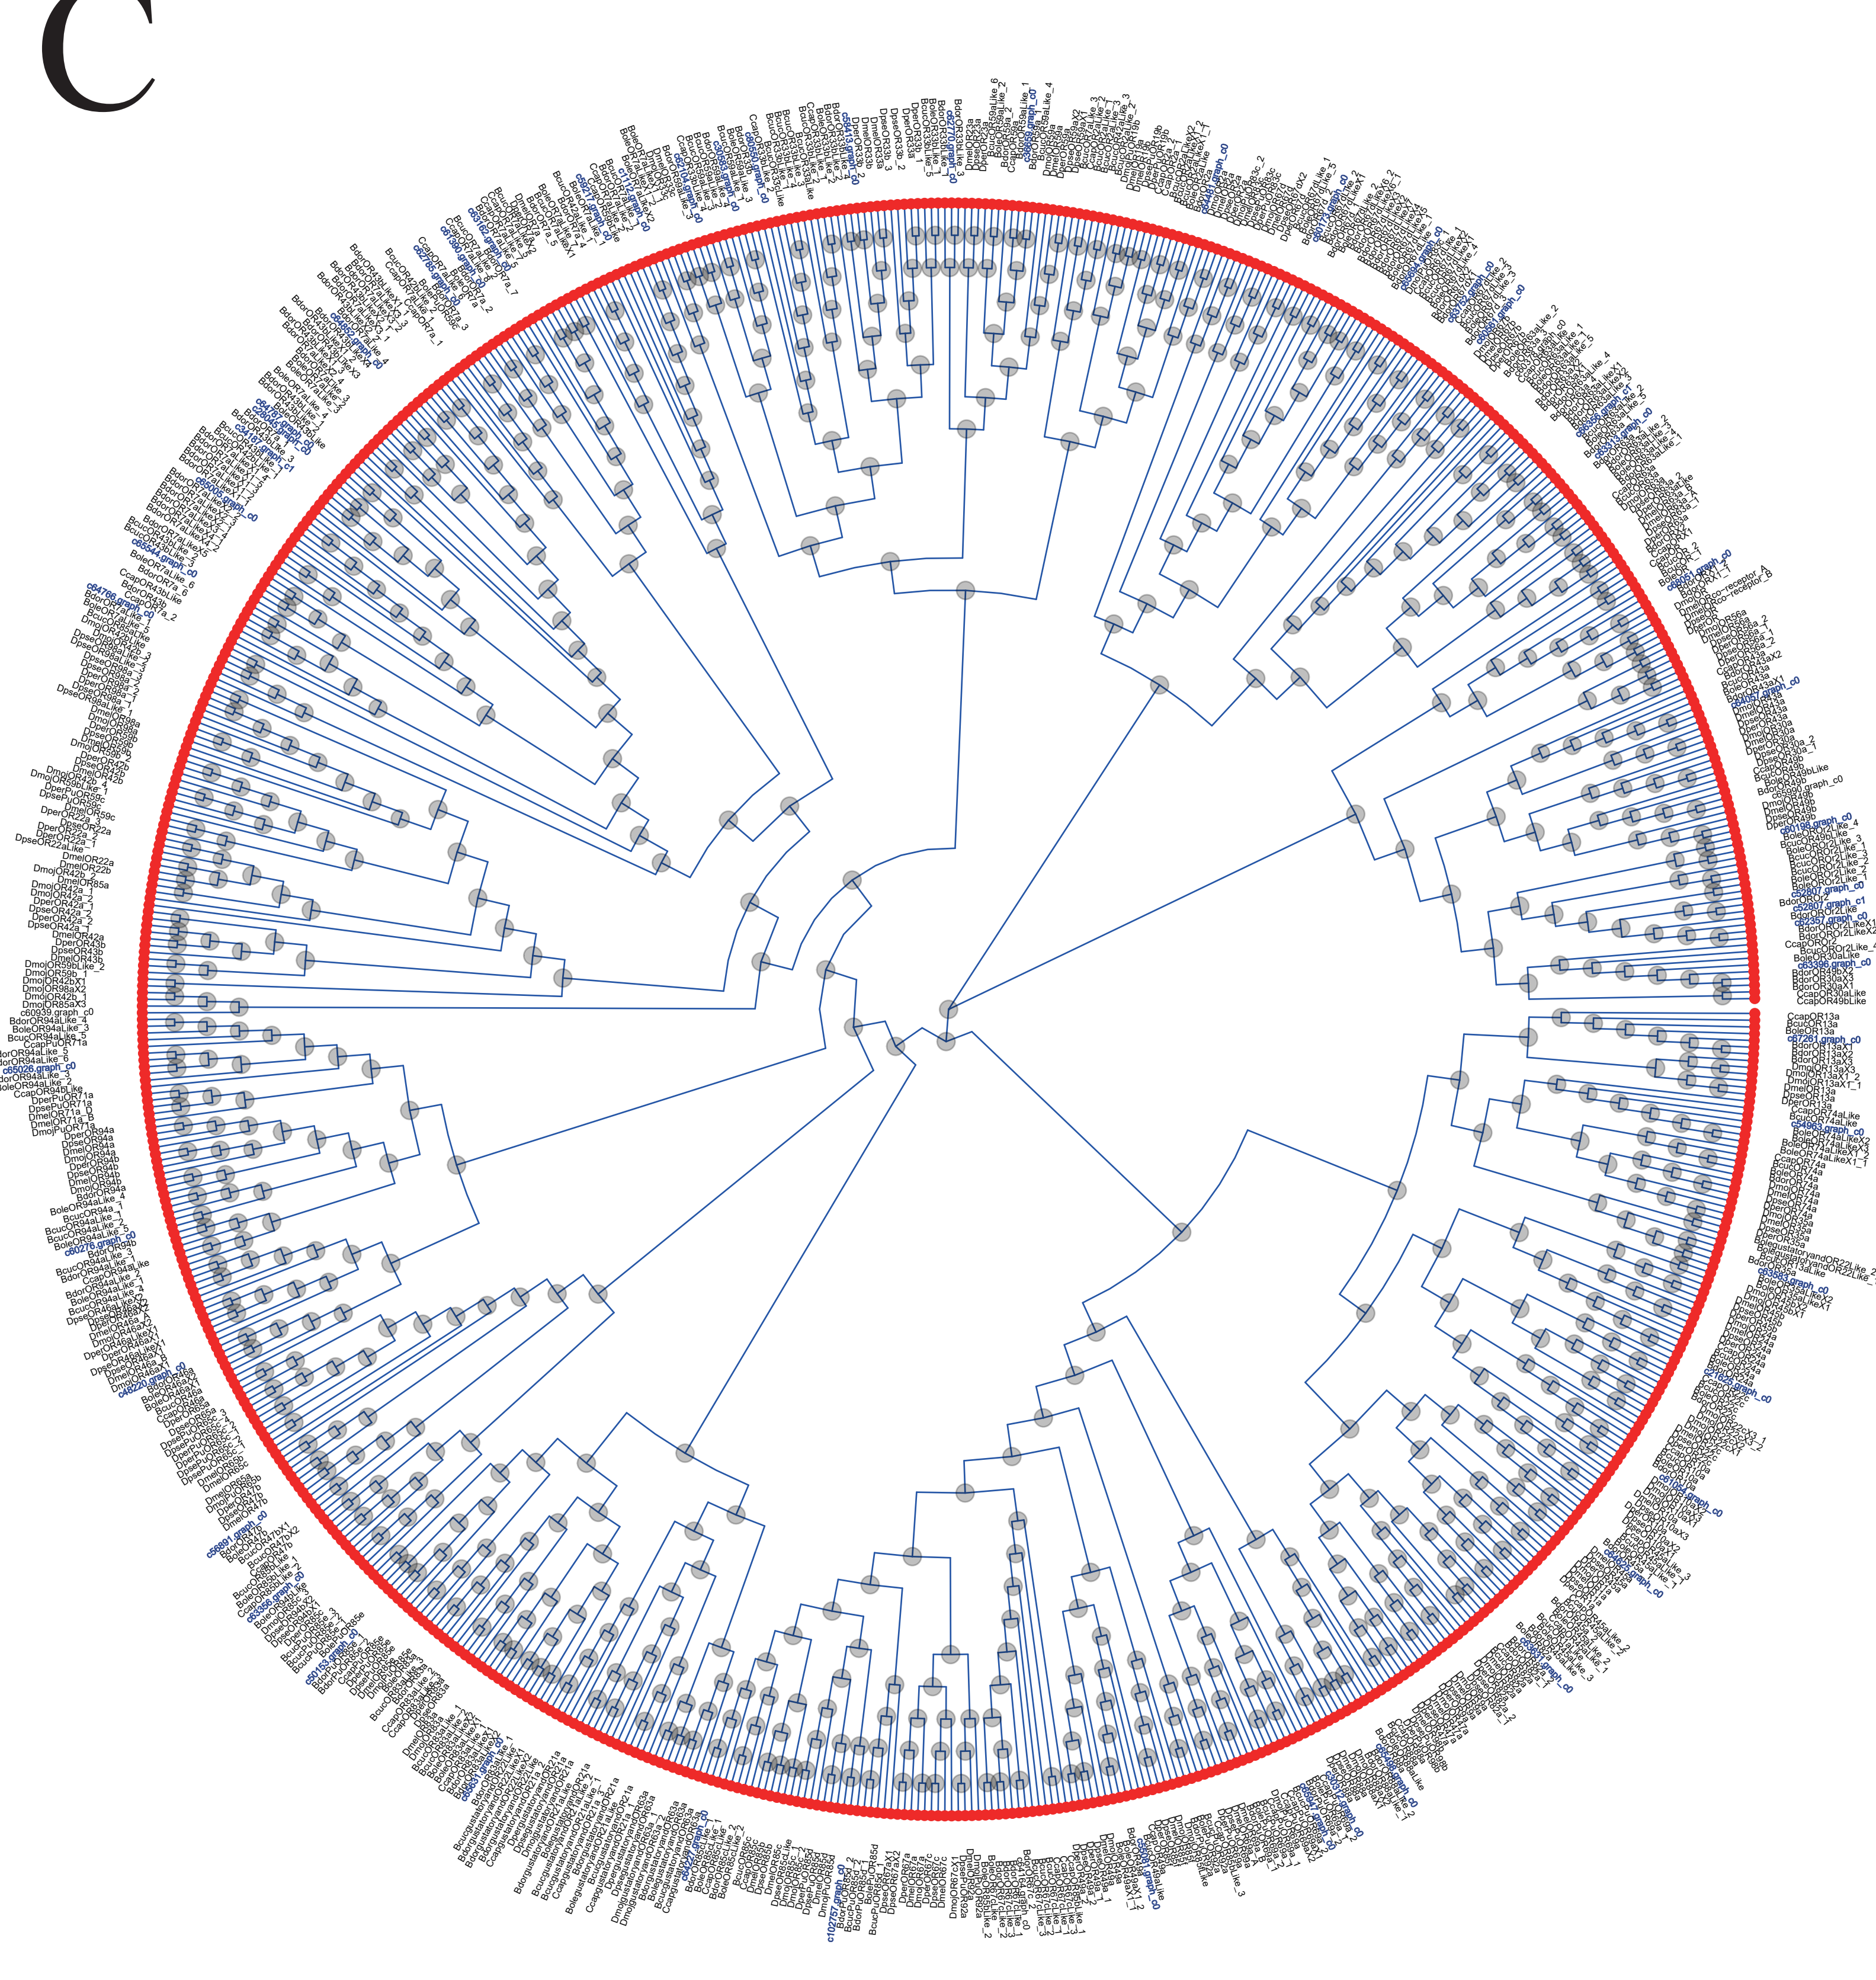

OR

D

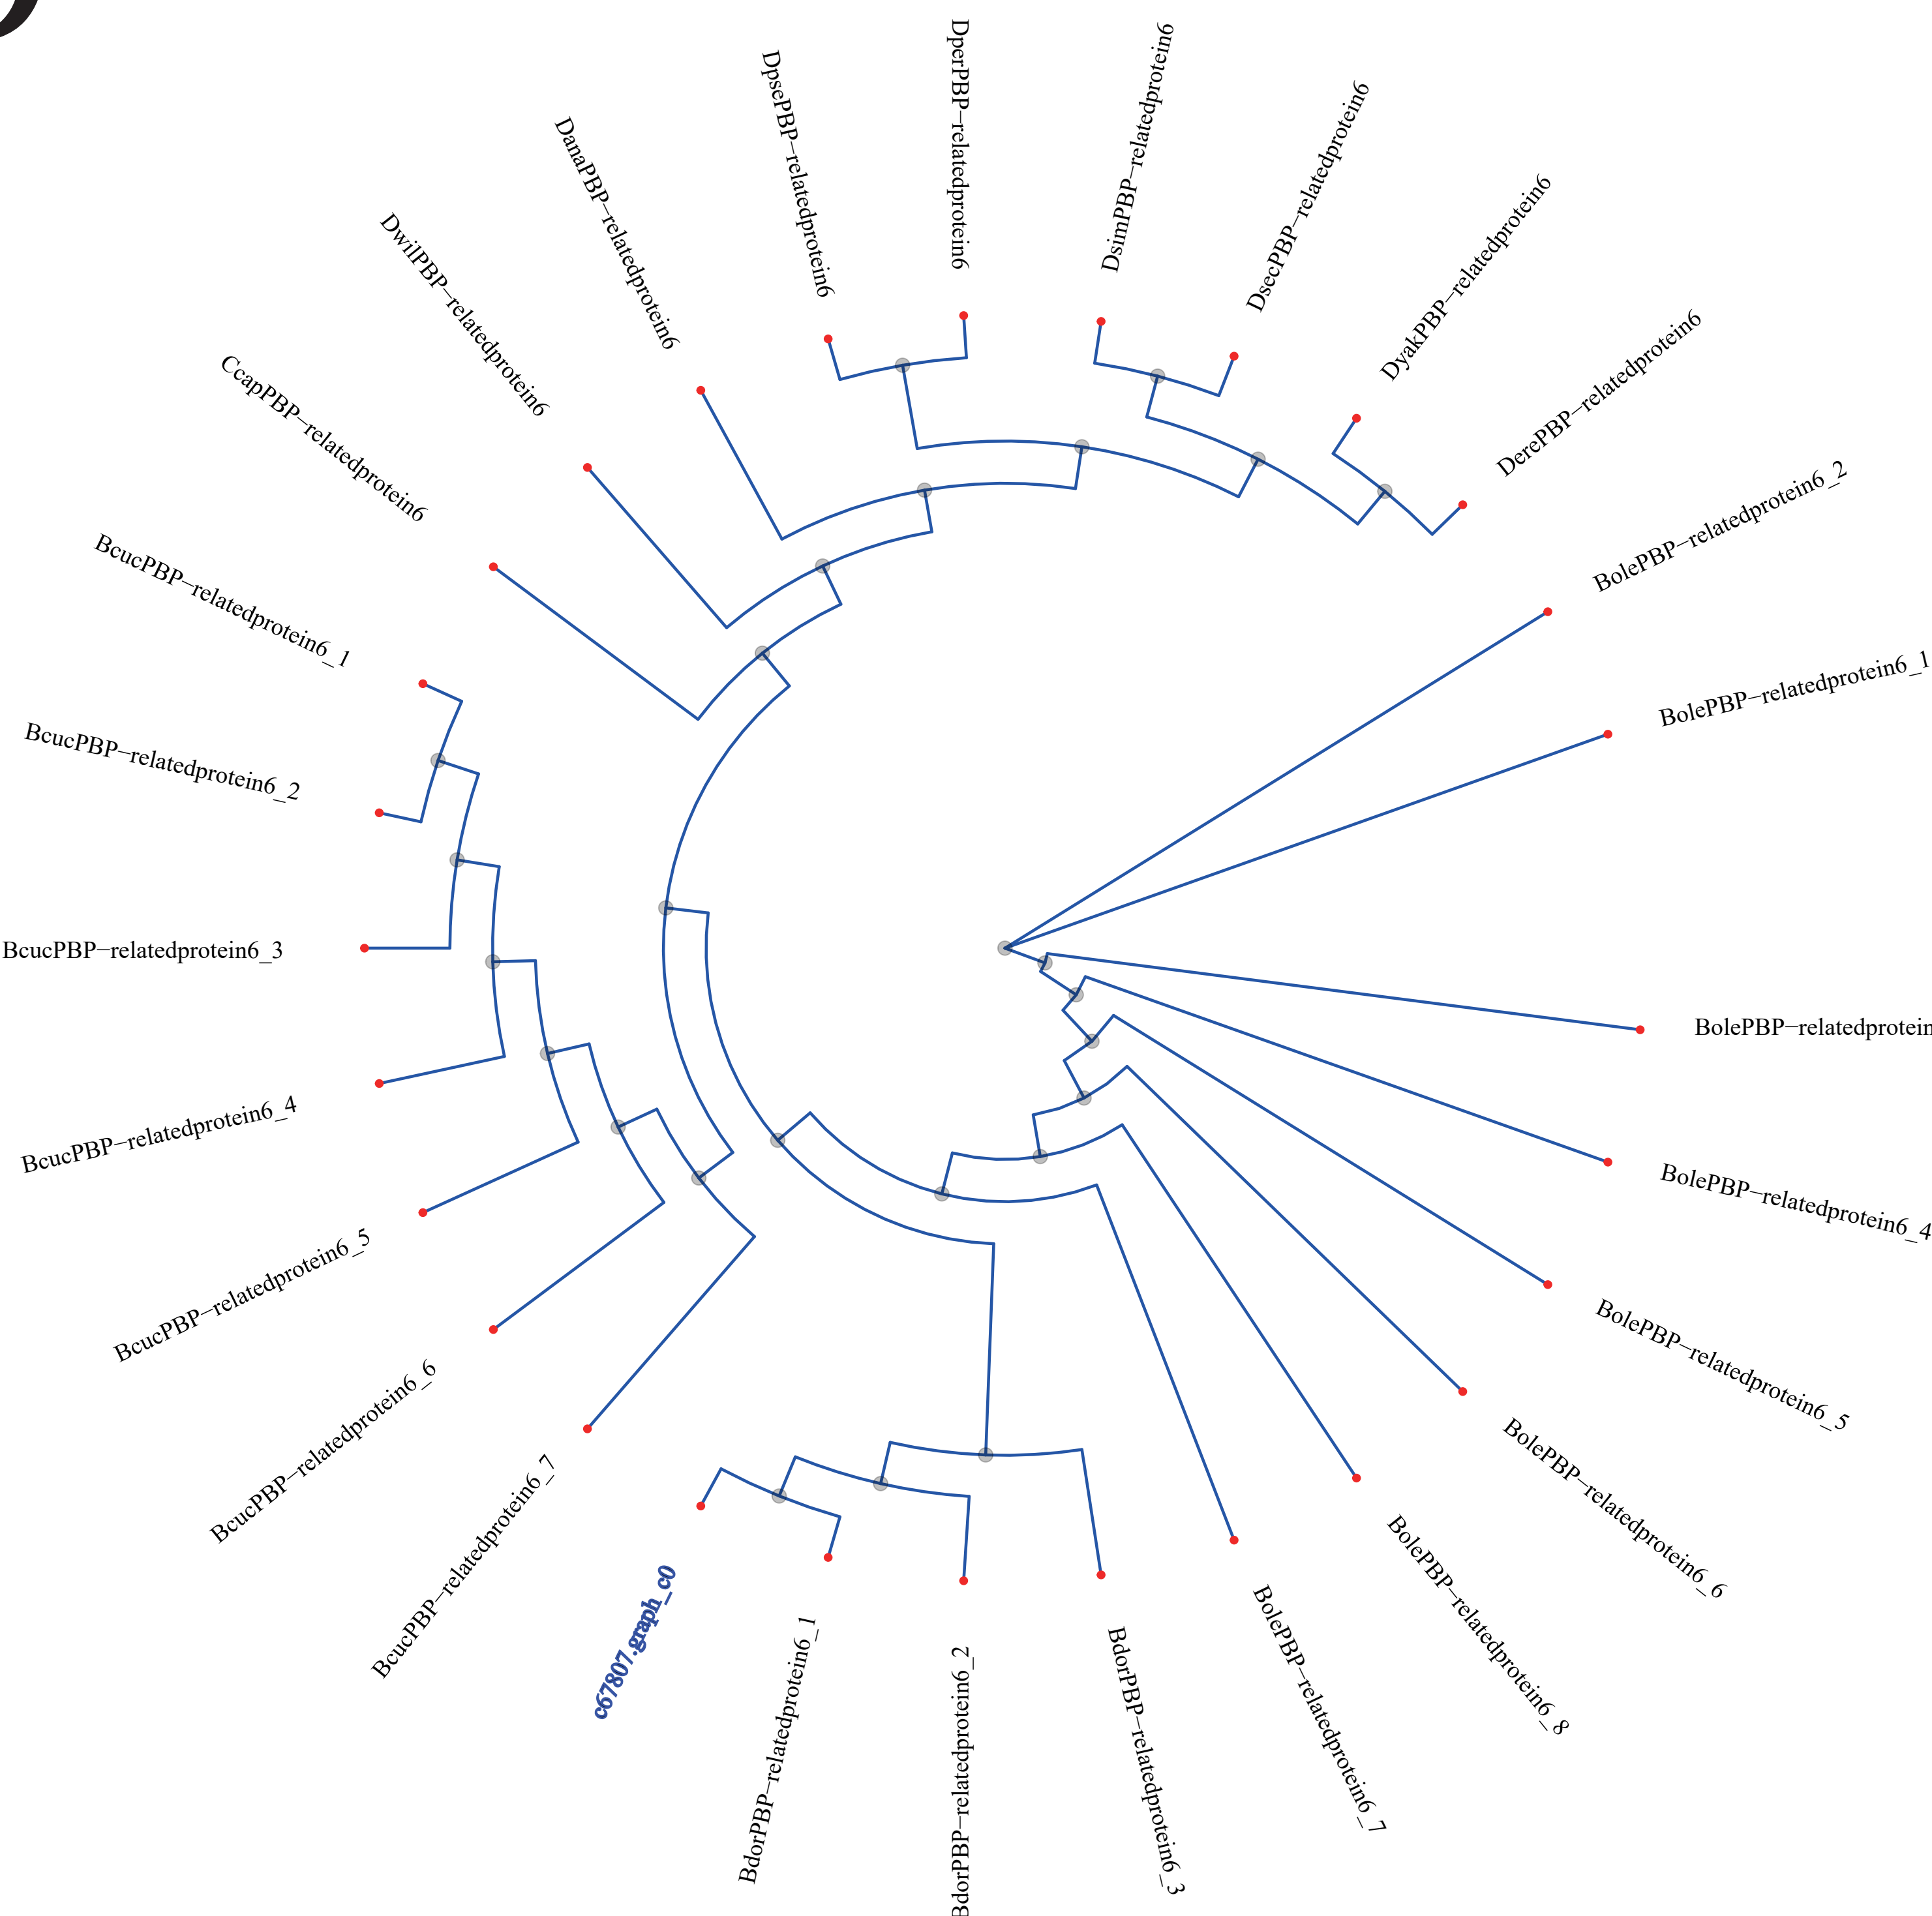

PBP

E

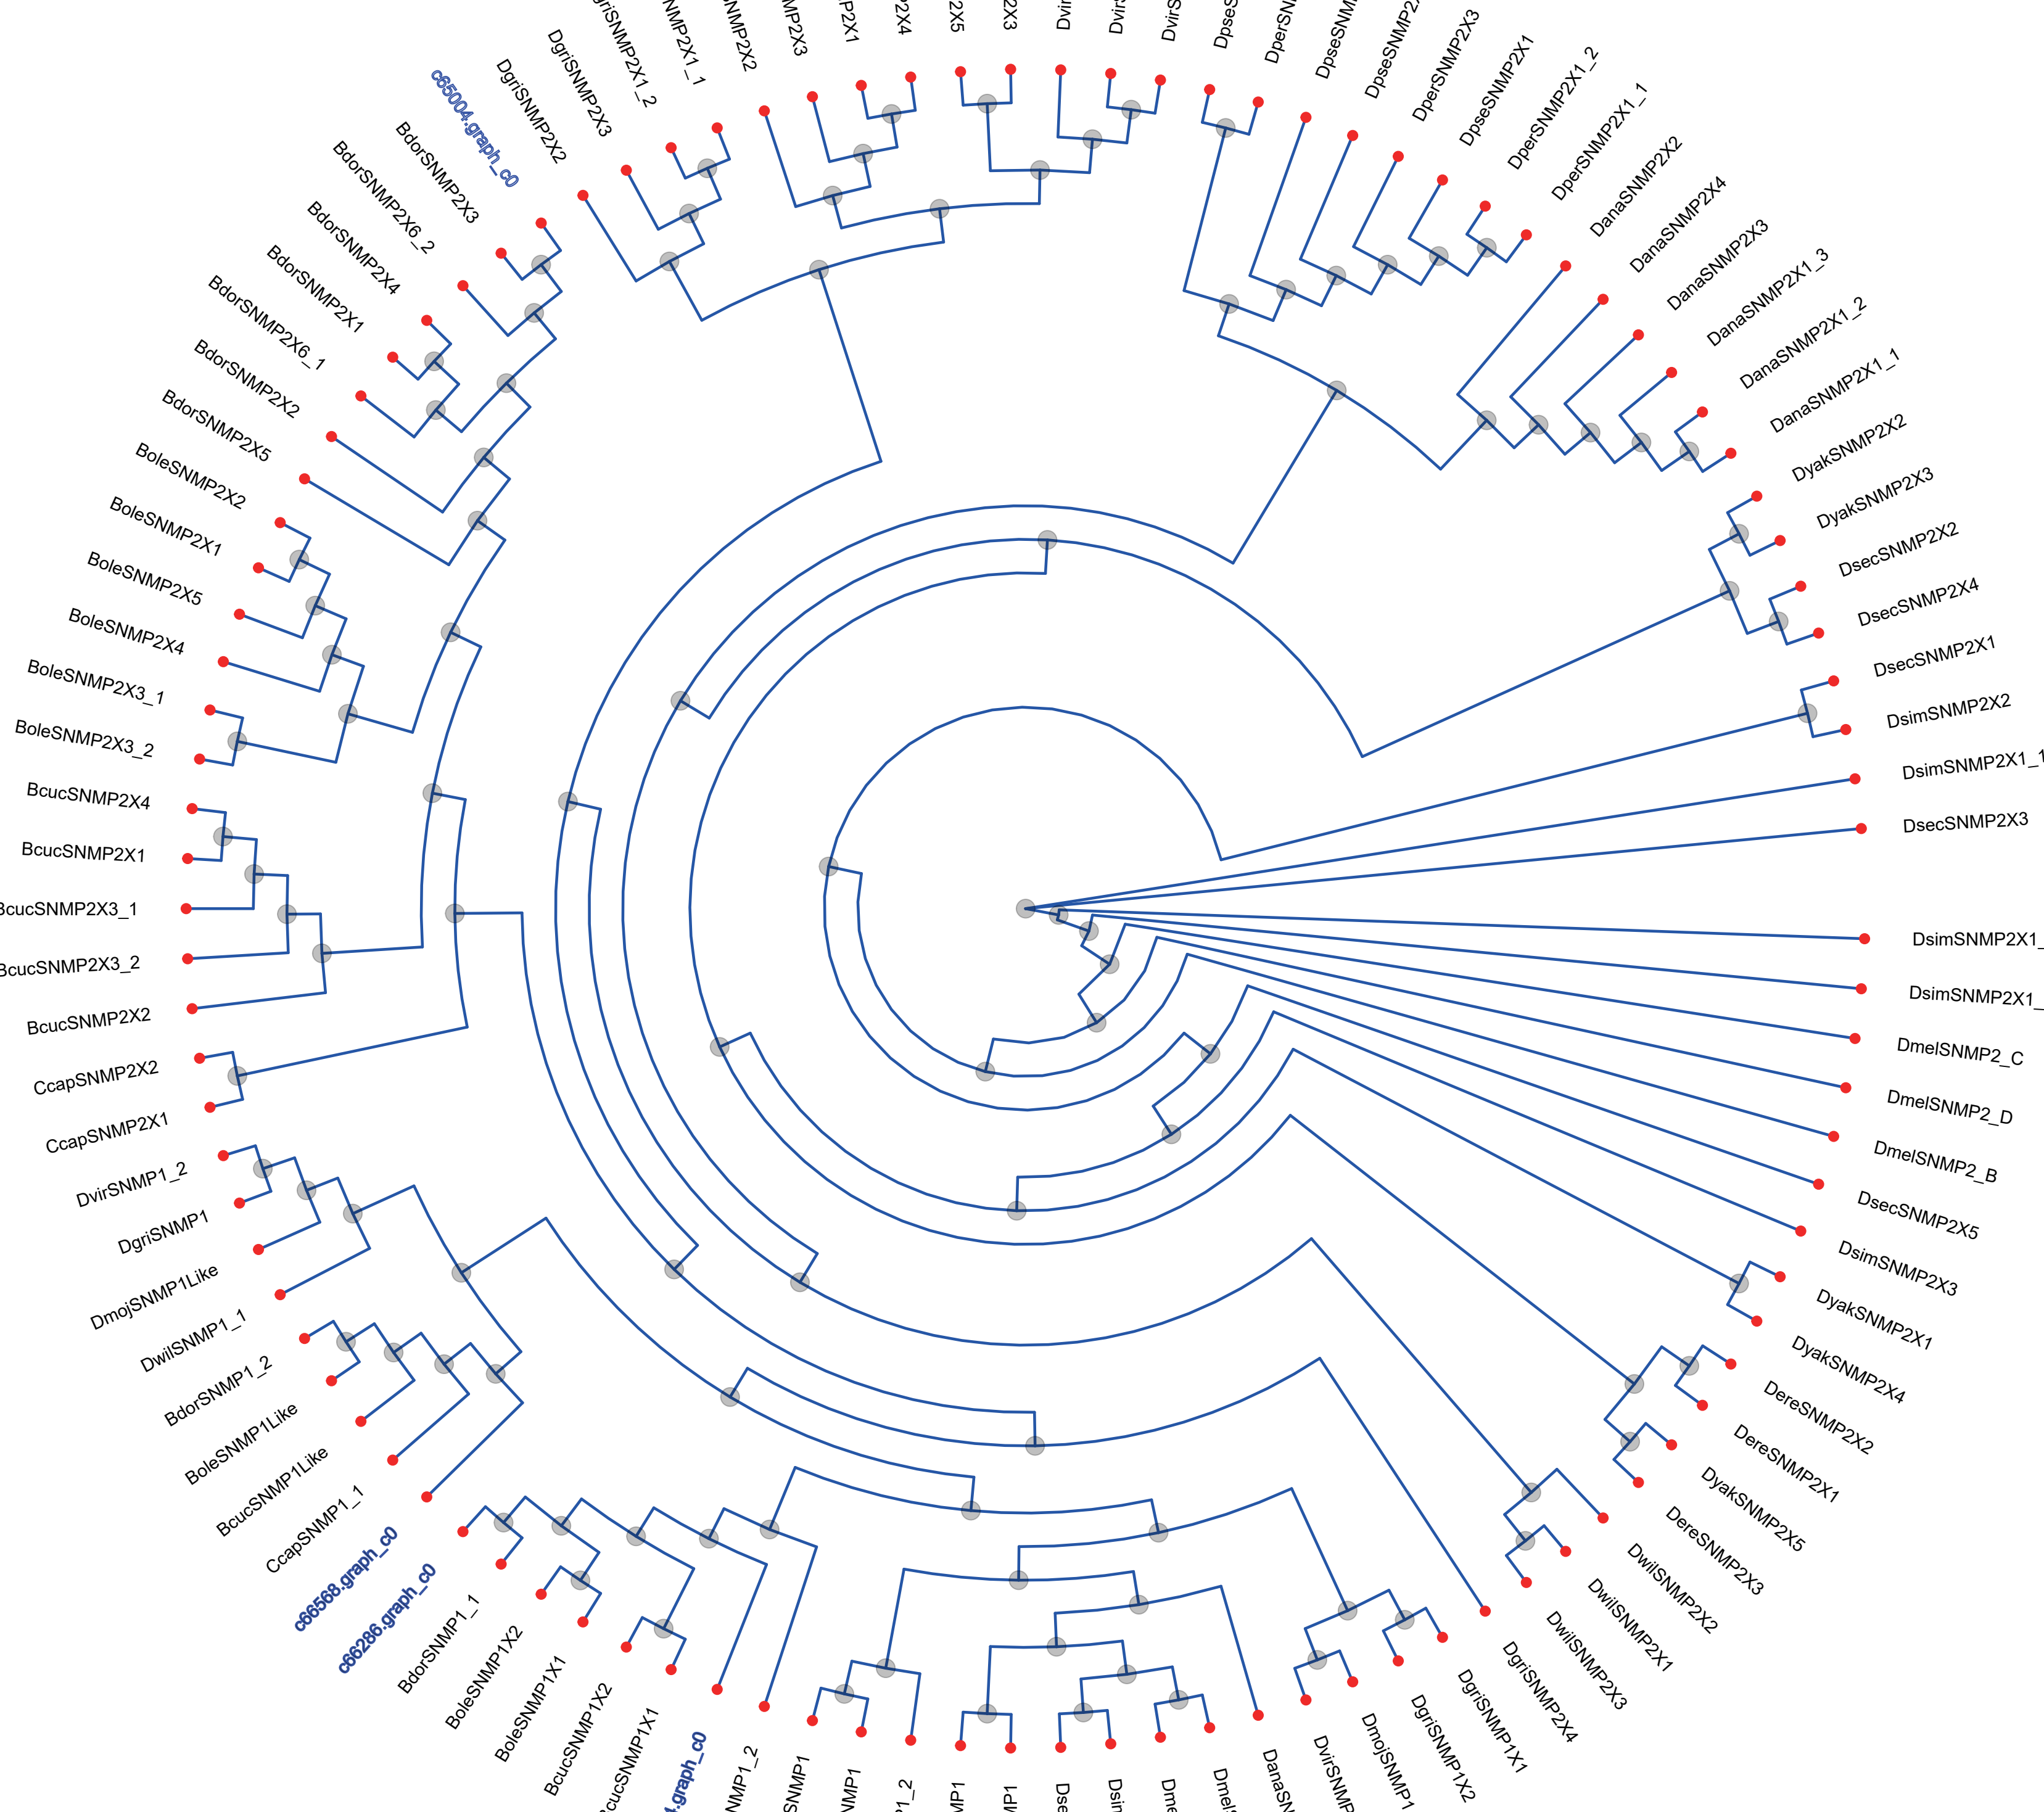

SNMP

F

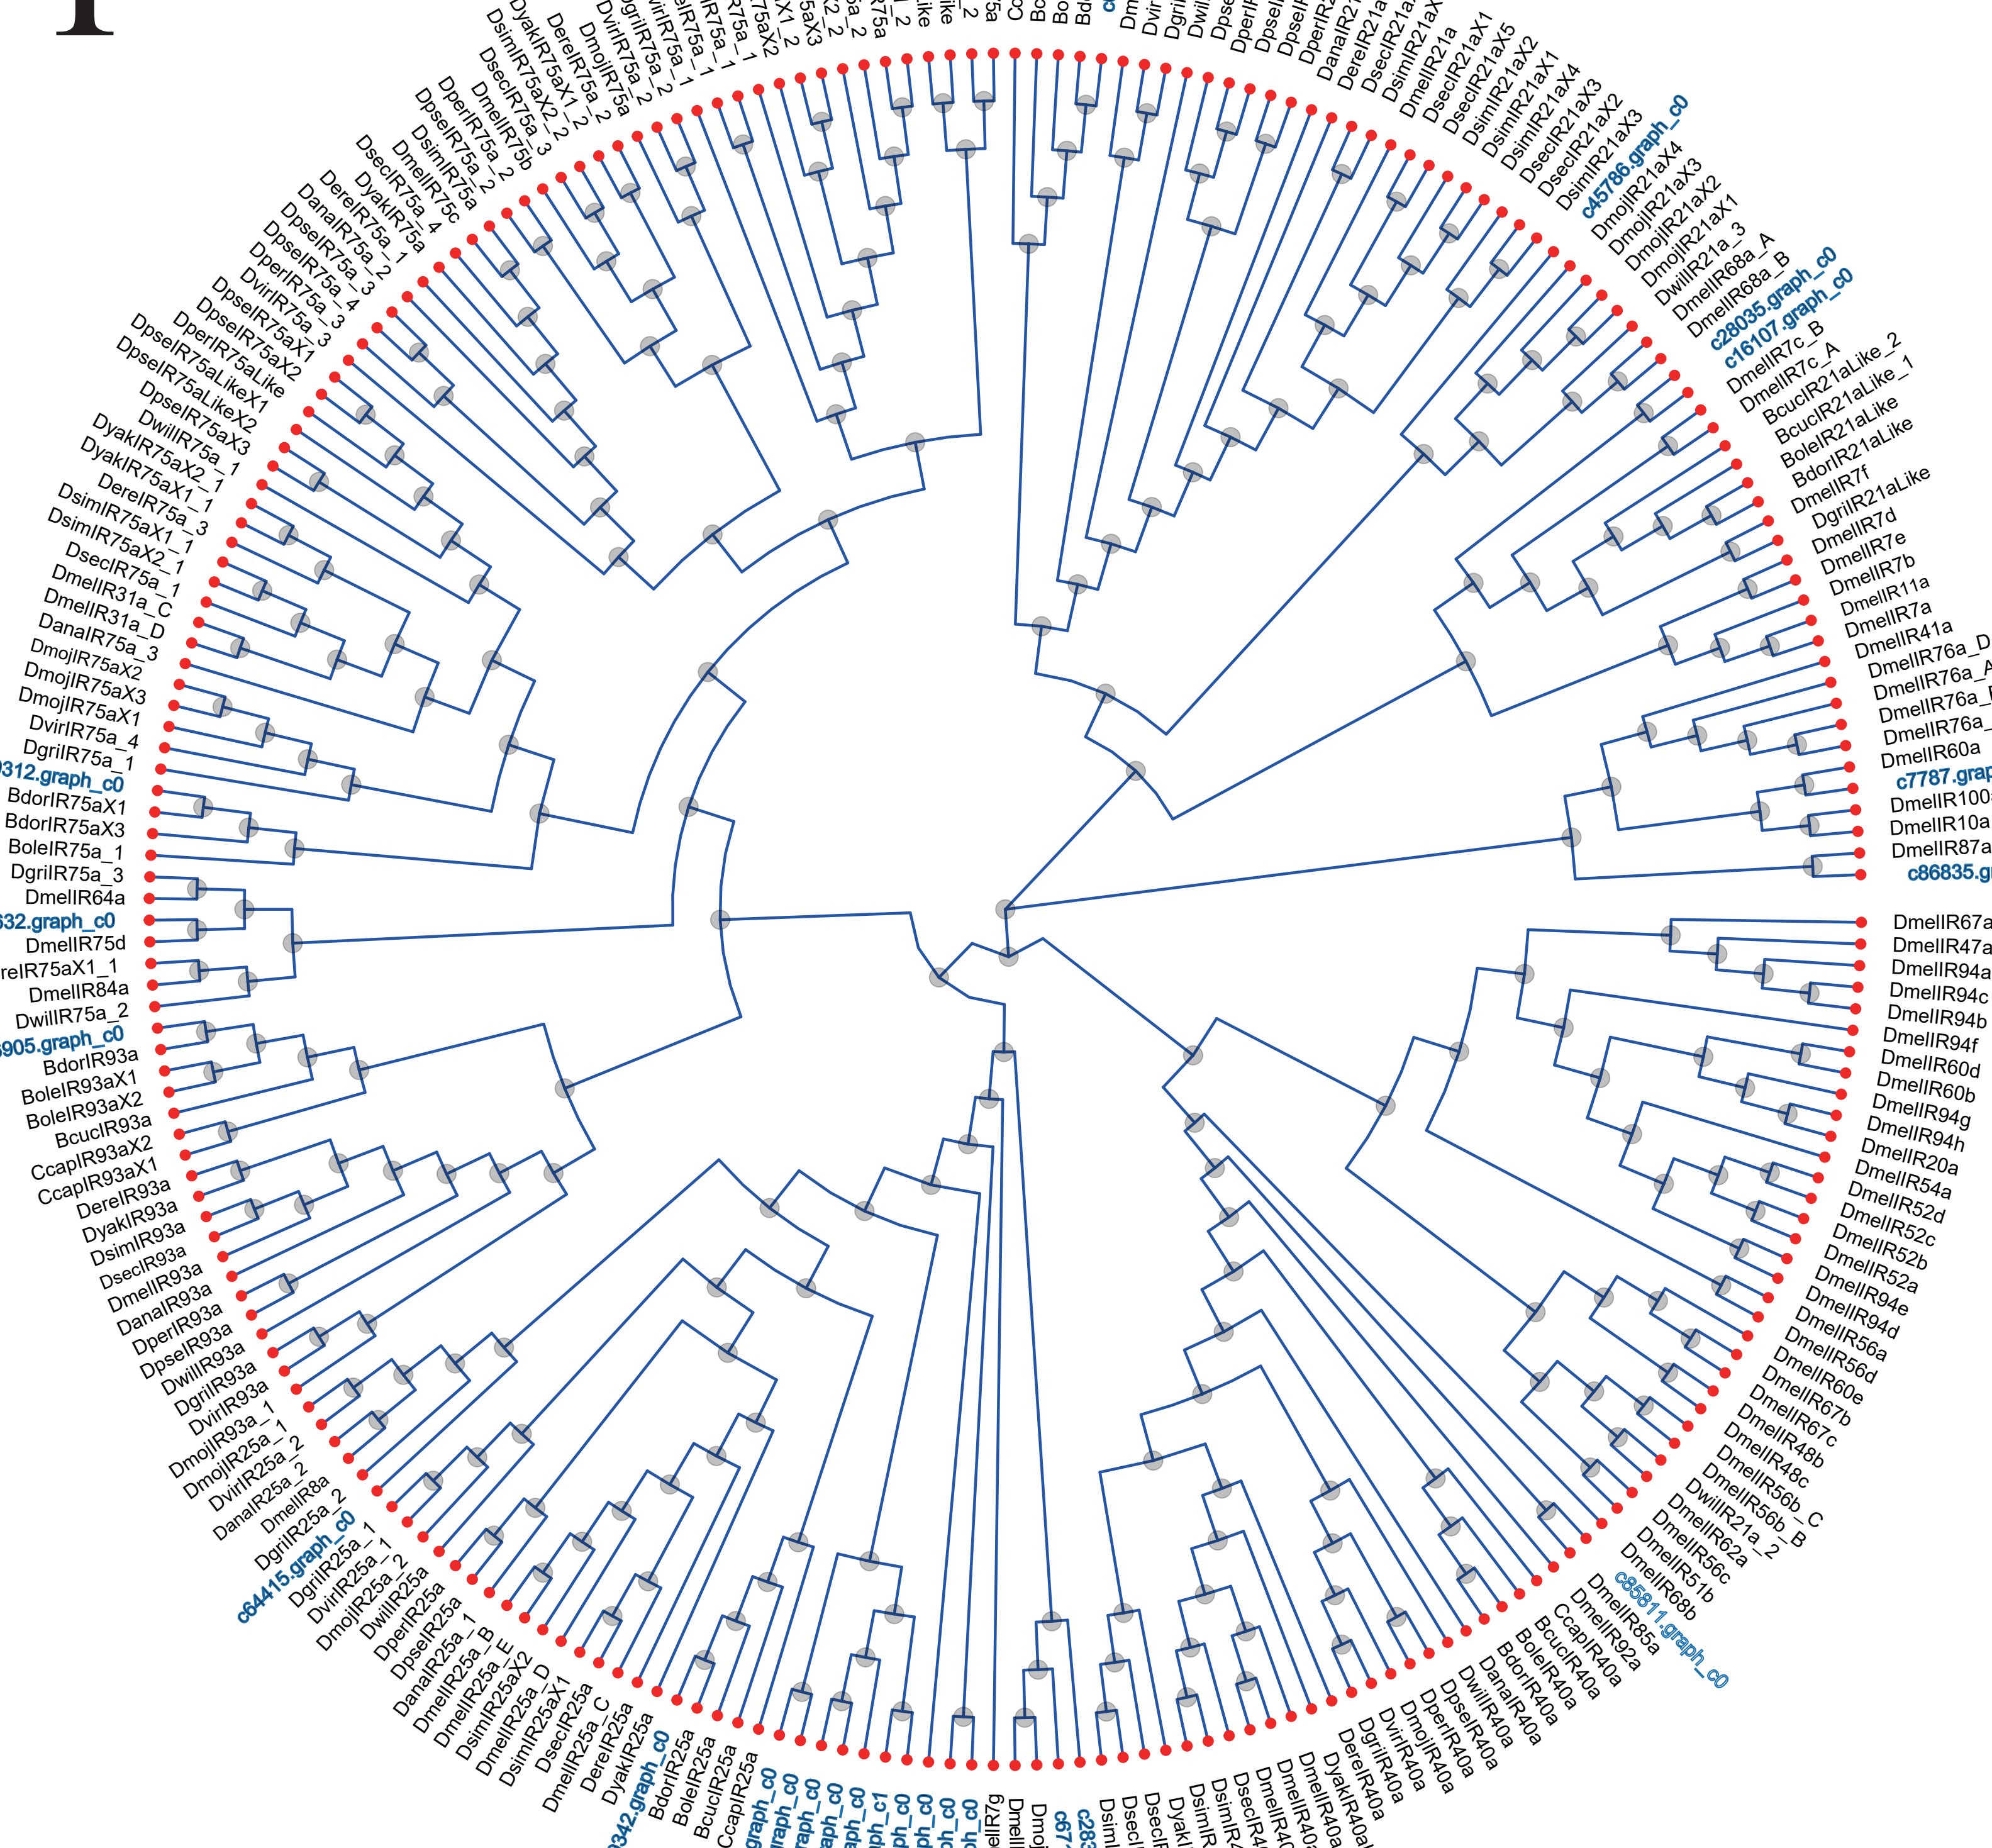

IR

Supplement: s1 [file s1]
